# Supplementary material for: Effective catalytic elimination of dichloromethane under humid environment over Co-based oxides
Source: Royal Society of Chemistry journal article supplement (doi:10.1039/d4cy01208a), 2024-11-20
Supplement: d4cy01208a1.pdf [file d4cy01208a1.pdf]

## Supporting Information

### Effective catalytic elimination of dichloromethane under humid environment over Co based oxides

Yongtao Li<sup>1</sup>, Chujun Luan<sup>1</sup>, Xueyan Zhu<sup>1</sup>, Jiaming Shao<sup>2</sup>, Fawei Lin<sup>1\*</sup>, Chi He<sup>3,4</sup>, Guanyi Chen<sup>5</sup>

<sup>1</sup> School of Environmental Science and Engineering, Tianjin University/Tianjin Key Lab of Biomass/Wastes Utilization, Tianjin 300072, P.R. China

<sup>2</sup> State Key Laboratory of Clean Energy Utilization, Zhejiang University, Hangzhou 310027, China

<sup>3</sup> State Key Laboratory of Multiphase Flow in Power Engineering, Xi'an Jiaotong University, Xi'an 710049, P.R. China

<sup>4</sup> National Engineering Laboratory for VOCs Pollution Control Material & Technology, University of Chinese Academy of Sciences, Beijing 101408, P.R. China

<sup>5</sup> School of Mechanical Engineering, Tianjin University of Commerce, Tianjin 300134, P.R. China

#### ORCID

Fawei Lin: <https://orcid.org/0000-0001-5461-8277>

\*Corresponding author:

Dr. Fawei Lin

Tel./Fax: +86 022-87401929

Email: [linfawei@tju.edu.cn](mailto:linfawei@tju.edu.cn)

### Text S1. Catalytic activity tests.

Catalytic ozonation of DCM was conducted in a self-designed platform that has described before. DCM was supplied by a cylinder gas (1000 ppm DCM with N<sub>2</sub> balanced) and further diluted into 100 ppm in the simulated gas mixture. O<sub>2</sub> flowed into a dielectric barrier discharger (HTU-500E) to produce ozone that was injected into the gas mixture. The initial ozone concentration was measured by ozone concentration analyzer (BMT-964BT). The total gas flow rate was 100 mL/min and O<sub>2</sub> concentration was 10 vol.%. The catalyst dosage was fixed at 50 mg, corresponding to a gas-time space velocity (GHSV) of 30000 h<sup>-1</sup>. Water vapor is produced by N<sub>2</sub> bubbling in a thermostatic bath. Water was injected into reaction system with N<sub>2</sub> bubbling at a certain temperature. The DCM reaction products were monitored and analyzed online by gas chromatograph (GC9790II). DCM ozone catalytic oxidation activity test reference text, DCM conversion rate and CO<sub>2</sub> yield are calculated by **Eqs. 1~2**.

$$\text{Acetone Conversion} = ([\text{ACE}]_{\text{initial}} - [\text{ACE}]_{\text{outlet}}) / [\text{ACE}]_{\text{initial}} \times 100\% \quad (1)$$

$$\text{CO}_2 \text{ Yield} = ([\text{CO}_2]_{\text{outlet}} / [\text{ACE}]_{\text{initial}} \times 3) \times 100\% \quad (2)$$

where [ACE]<sub>initial</sub> and [ACE]<sub>outlet</sub> are the initial and outlet DCM concentration (ppm), respectively, [CO]<sub>outlet</sub> and [CO<sub>2</sub>]<sub>outlet</sub> are the outlet CO and CO<sub>2</sub> concentration (ppm), respectively.

The reaction rate (*r*, mol g<sup>-1</sup> s<sup>-1</sup>) of acetone oxidation was calculated according to **Eq. 3**<sup>4</sup>.

$$r = C \cdot X \cdot F / m \quad (3)$$

Where X denotes the DCM conversion, C is the DCM concentration in the gas mixture (mol/mL), F is the total flow rate (mL/s), and m is the weight of the catalyst (g). When the DCM conversion is lower than 20%, the reaction rate can be expressed by **Eq. 4**<sup>5</sup>. Accordingly, the slope of the linear relationship between ln*r* and 1/T is the activation energy (E<sub>a</sub>).

$$\ln r = - E_a / RT + C \quad (4)$$

TOF was calculated based on the converted mole number of DCM per second per mole of surface chemisorbed oxygen at 120°C, respectively. Example for TOF calculation on 0.003 CoO<sub>x</sub>-UF10 catalyst

Co content of CoO<sub>x</sub>-UF10: 0.6402 × 0.003/59 = 3.26 × 10<sup>-5</sup> mol (determined by +9

Co content of CoO<sub>x</sub>-U:  $0.7525 \times 0.003/59 = 3.82 \times 10^{-5}$  mol (determined by **Table S3**)

TOF (Co) of CoO<sub>x</sub>-UF10 (dry) = DCM concentration  $\times$  flow rate  $\times$  DCM conversion / (22.4  $\times$  Co content  $\times$  60) =  $100 \times 10^{-6} \times 100 \times 10^{-3} \times 6.5 \times 10^{-2} / (22.4 \times 3.26 \times 10^{-5} \times 60) = 1.48 \times 10^{-5} \text{ s}^{-1}$ .

TOF (Co) of CoO<sub>x</sub>-U (dry) = DCM concentration  $\times$  flow rate  $\times$  DCM conversion / (22.4  $\times$  Co content  $\times$  60) =  $100 \times 10^{-6} \times 100 \times 10^{-3} \times 4.5 \times 10^{-2} / (22.4 \times 3.82 \times 10^{-5} \times 60) = 8.76 \times 10^{-6} \text{ s}^{-1}$ .

TOF (Co) of CoO<sub>x</sub>-UF10 (wet) = DCM concentration  $\times$  flow rate  $\times$  DCM conversion / (22.4  $\times$  Co content  $\times$  60) =  $100 \times 10^{-6} \times 100 \times 10^{-3} \times 8.9 \times 10^{-2} / (22.4 \times 3.26 \times 10^{-5} \times 60) = 2.03 \times 10^{-5} \text{ s}^{-1}$ .

TOF (Co) of CoO<sub>x</sub>-U (wet) = DCM concentration  $\times$  flow rate  $\times$  DCM conversion / (22.4  $\times$  Co content  $\times$  60) =  $100 \times 10^{-6} \times 100 \times 10^{-3} \times 5.4 \times 10^{-2} / (22.4 \times 3.82 \times 10^{-5} \times 60) = 1.05 \times 10^{-5} \text{ s}^{-1}$ .

## **Text S2. Catalytic activity tests.**

The specific surface area of catalysts was measured by Brunauer-Emmett-Teller (BET) model from N<sub>2</sub> adsorption-desorption isotherms on a gas adsorption apparatus (BELSORP-max, Japan). Besides, Barrett-Joyner-Halenda (BJH) method was used to analyze pore structures. X-ray diffraction (XRD) patterns were obtained on an X'Pert Pro MRD (PANalytical, Netherlands) instrument using a Cu K $\alpha$  radiation ( $\lambda=1.54056 \text{ \AA}$ ,  $10^\circ \text{ min}^{-1}$  from  $10$  to  $80^\circ$ ) with the voltage of  $40 \text{ kV}$  and current of  $40 \text{ mA}$ . The micro-morphologies of catalysts were conducted on a JEOL JSM-7800F field emission scanning electron microscopy (SEM). The transmission electron microscopy (TEM) images and elements scanning maps were detected on JEM-2800 electron microscopy (JEOL, Japan) and energy dispersive spectrometer (EDS), respectively. X-ray photoelectron spectra (XPS) were recorded on a Thermo Scientific Escalab 250Xi S4 spectrometer and all binding energies were corrected by referring to the C 1s peak at  $284.6 \text{ eV}$ . H<sub>2</sub> temperature-programmed reduction (H<sub>2</sub>-TPR), NH<sub>3</sub> temperature-programmed desorption (NH<sub>3</sub>-TPD), and O<sub>2</sub> temperature-programmed desorption (O<sub>2</sub>-TPD) were conducted on a chemical adsorption analyzer (PCA-1200) to analyze various surface chemical properties. All the samples were purged at  $150 \text{ }^\circ\text{C}$  for  $1 \text{ h}$  under  $50 \text{ mL/min}$  He. For NH<sub>3</sub>-TPD and O<sub>2</sub>-TPD tests,  $\sim 100 \text{ mg}$  purged catalysts were treated with a  $30 \text{ mL/min}$  of  $5 \text{ vol.}\% \text{ NH}_3/\text{N}_2$  and  $5 \text{ vol.}\% \text{ O}_2/\text{He}$ , respectively, to reach saturated adsorption. Subsequently, the programs were heated up to  $1173 \text{ K}$  ( $10 \text{ K/min}$ ) under  $30 \text{ mL/min}$  N<sub>2</sub> to collect the desorbed NH<sub>3</sub>/O<sub>2</sub> signals. For H<sub>2</sub>-TPR,  $\sim 50 \text{ mg}$  pretreated samples were heated up to  $800 \text{ }^\circ\text{C}$  ( $10 \text{ }^\circ\text{C/min}$ ) under  $30 \text{ mL/min}$   $10 \text{ vol.}\% \text{ H}_2/\text{He}$  and the signal intensity was recorded by a TCD detector. Raman spectra was obtained by LabRAM HR Evolution-Raman spectrometer (Jobin Yvon S.A.S, France). Electron paramagnetic resonance (EPR) was carried out to analyze the oxygen vacancy of catalysts using an EMXPlus instrument. The contact angle was measured by Dataphysics-OCA20.

### **Text S3. In-situ DRIFTS details.**

In-situ diffused reflectance infrared Fourier transform spectroscopy (in-situ DRIFTS) measurements of DCM catalytic ozonation with presence of water vapor were conducted on an iS50 spectrometer equipped with a reaction chamber (Praying Mantis). Prior to tests, the catalyst was purged by 100 mL/min  $N_2$  at 120 °C for 30 min. Subsequently, DCM and  $O_2/O_3$  flows were introduced according to experimental settings. Water vapor was also injected by bubbling method. All the in-situ spectra were recorded from 600~4000  $cm^{-1}$  at a resolution of 4  $cm^{-1}$ .

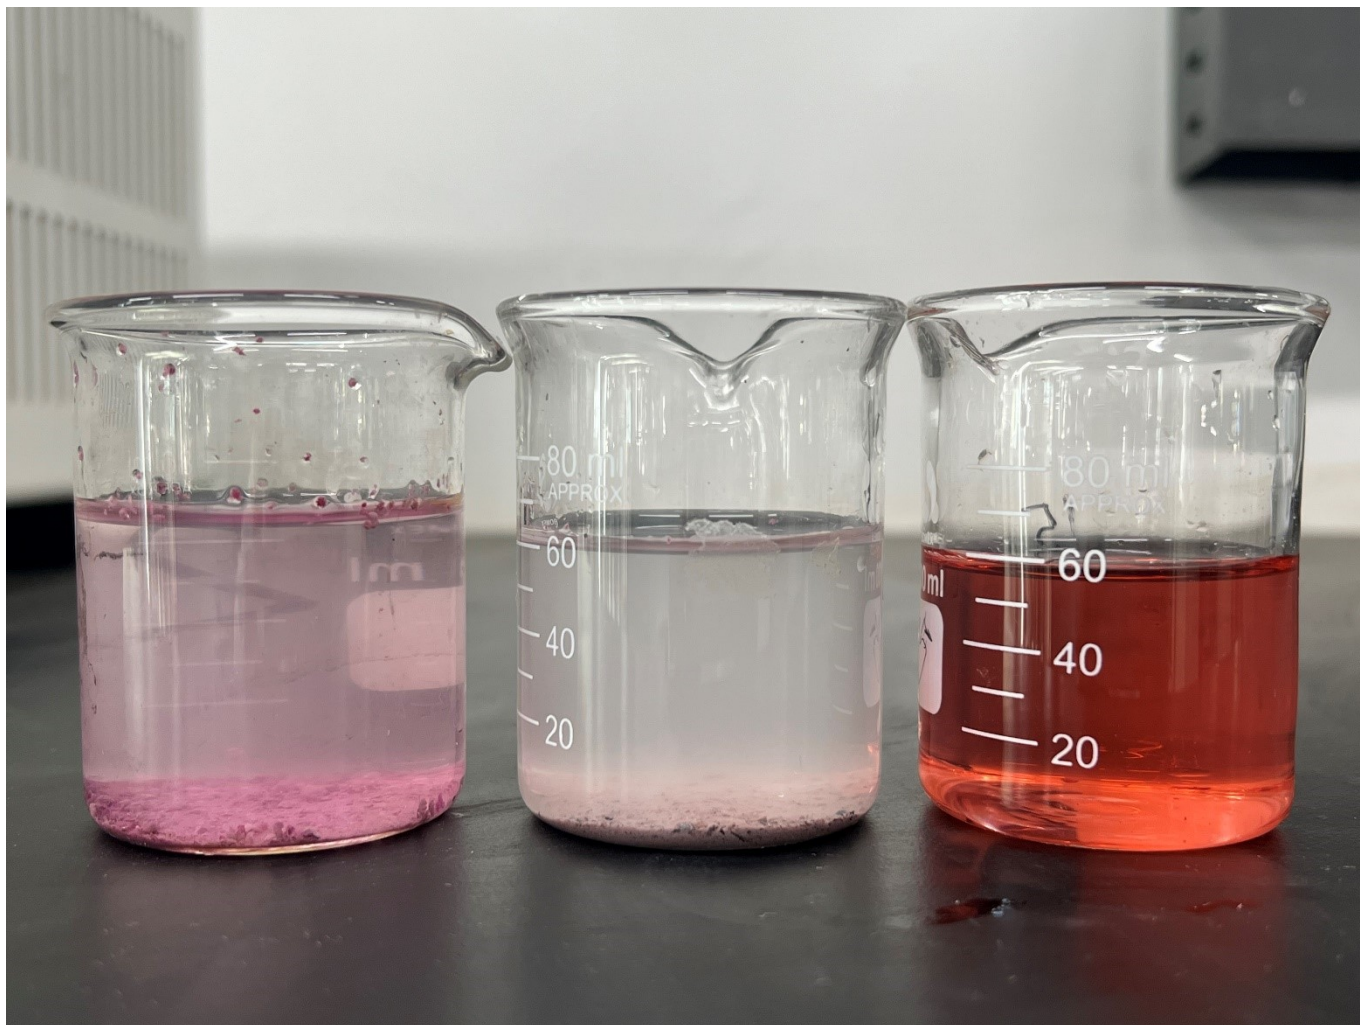

**Fig. S1.** Real picture of catalyst crystallization effect after hydrothermal process

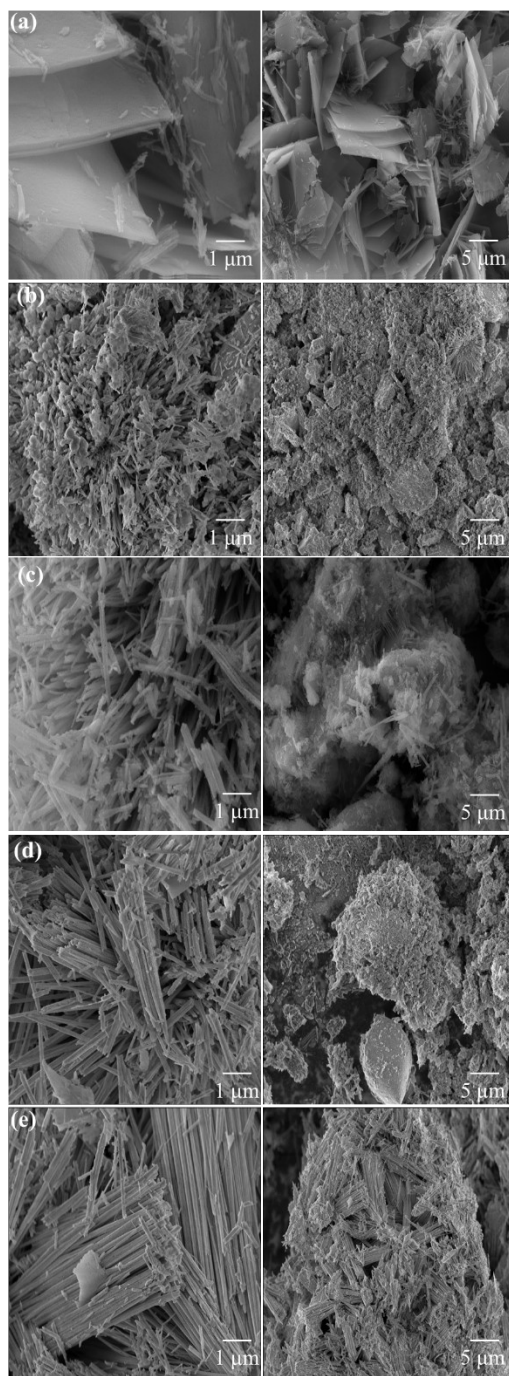

**Fig. S2.** SEM of CoOx-U (a), CoOx-UF5 (b), CoOx-UF10 (c), CoOx-UF15 (d), CoOx-UF20 (e).

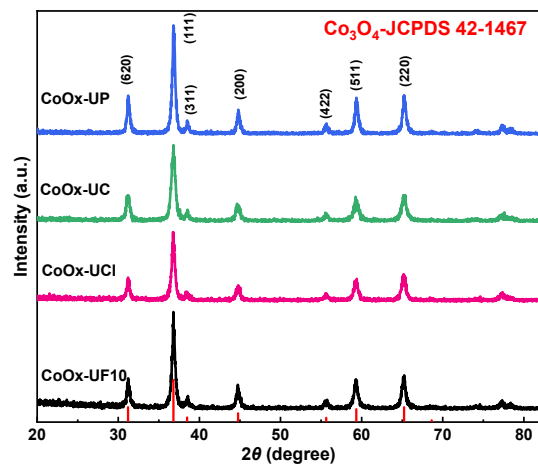

**Fig. S3.** XRD patterns of catalysts with varied template agents.



**Table S1.** Pore structure parameters of catalysis.

| Catalysts              | BET specific surface area<br>(m <sup>2</sup> /g) | Total pore volume <sup>a</sup><br>(cm <sup>3</sup> /g) | Average pore size <sup>b</sup><br>(nm) |
|------------------------|--------------------------------------------------|--------------------------------------------------------|----------------------------------------|
| CoO <sub>x</sub> -U    | 65.1                                             | 0.20                                                   | 9.6                                    |
| CoO <sub>x</sub> -UF5  | 52.0                                             | 0.16                                                   | 12.4                                   |
| CoO <sub>x</sub> -UF10 | 68.3                                             | 0.20                                                   | 17.3                                   |
| CoO <sub>x</sub> -UF15 | 43.5                                             | 0.29                                                   | 17.1                                   |
| CoO <sub>x</sub> -UF20 | 49.8                                             | 0.25                                                   | 16.8                                   |

<sup>a</sup> BET specific surface area obtained at  $P/P_0 = 0.05-0.30$ ; <sup>b</sup> Total pore volume estimated at  $P/P_0 = 0.98$  <sup>b</sup> BJH pore diameter calculated from the N<sub>2</sub> adsorption branch.

**Table S2.** Textural property and semi-quantitative results of synthesized catalysts.

| Catalysts              | H <sub>2</sub> consumption <sup>a</sup> (a.u.) | O <sub>2</sub> desorption <sup>a</sup> (a.u.) | NH <sub>3</sub> desorption <sup>a</sup> (a.u.) |
|------------------------|------------------------------------------------|-----------------------------------------------|------------------------------------------------|
| CoO <sub>x</sub> -U    | 10992439                                       | 373401                                        | 373401                                         |
| CoO <sub>x</sub> -UF5  | 8927688                                        | 377695                                        | 6500                                           |
| CoO <sub>x</sub> -UF10 | 10376518                                       | 373376                                        | 418734                                         |
| CoO <sub>x</sub> -UF15 | 11634308                                       | 428764                                        | 311824                                         |
| CoO <sub>x</sub> -UF20 | 11615282                                       | 358908                                        | 394890                                         |

<sup>a</sup>Peak areas of H<sub>2</sub> consumption, O<sub>2</sub> desorption, and NH<sub>3</sub> desorption obtained from H<sub>2</sub>-TPR, O<sub>2</sub>-TPD and NH<sub>3</sub>-TPD results, respectively.

**Table S3.** The content of Co element measured by ICP.

|                | CoO <sub>x</sub> -U | CoO <sub>x</sub> -UF5 | CoO <sub>x</sub> -UF10 | CoO <sub>x</sub> -UF15 | CoO <sub>x</sub> -UF20 |
|----------------|---------------------|-----------------------|------------------------|------------------------|------------------------|
| Co content (%) | 75.25               | 72.81                 | 64.02                  | 75.56                  | 77.84                  |
